# Supplementary material for: Reductive Evolution and Diversification of C5-Uracil Methylation in the Nucleic Acids of Mollicutes
Source: MDPI journal article supplement (doi:10.3390/biom10040587), 2020-04-10
Supplement: s1 [file s1]

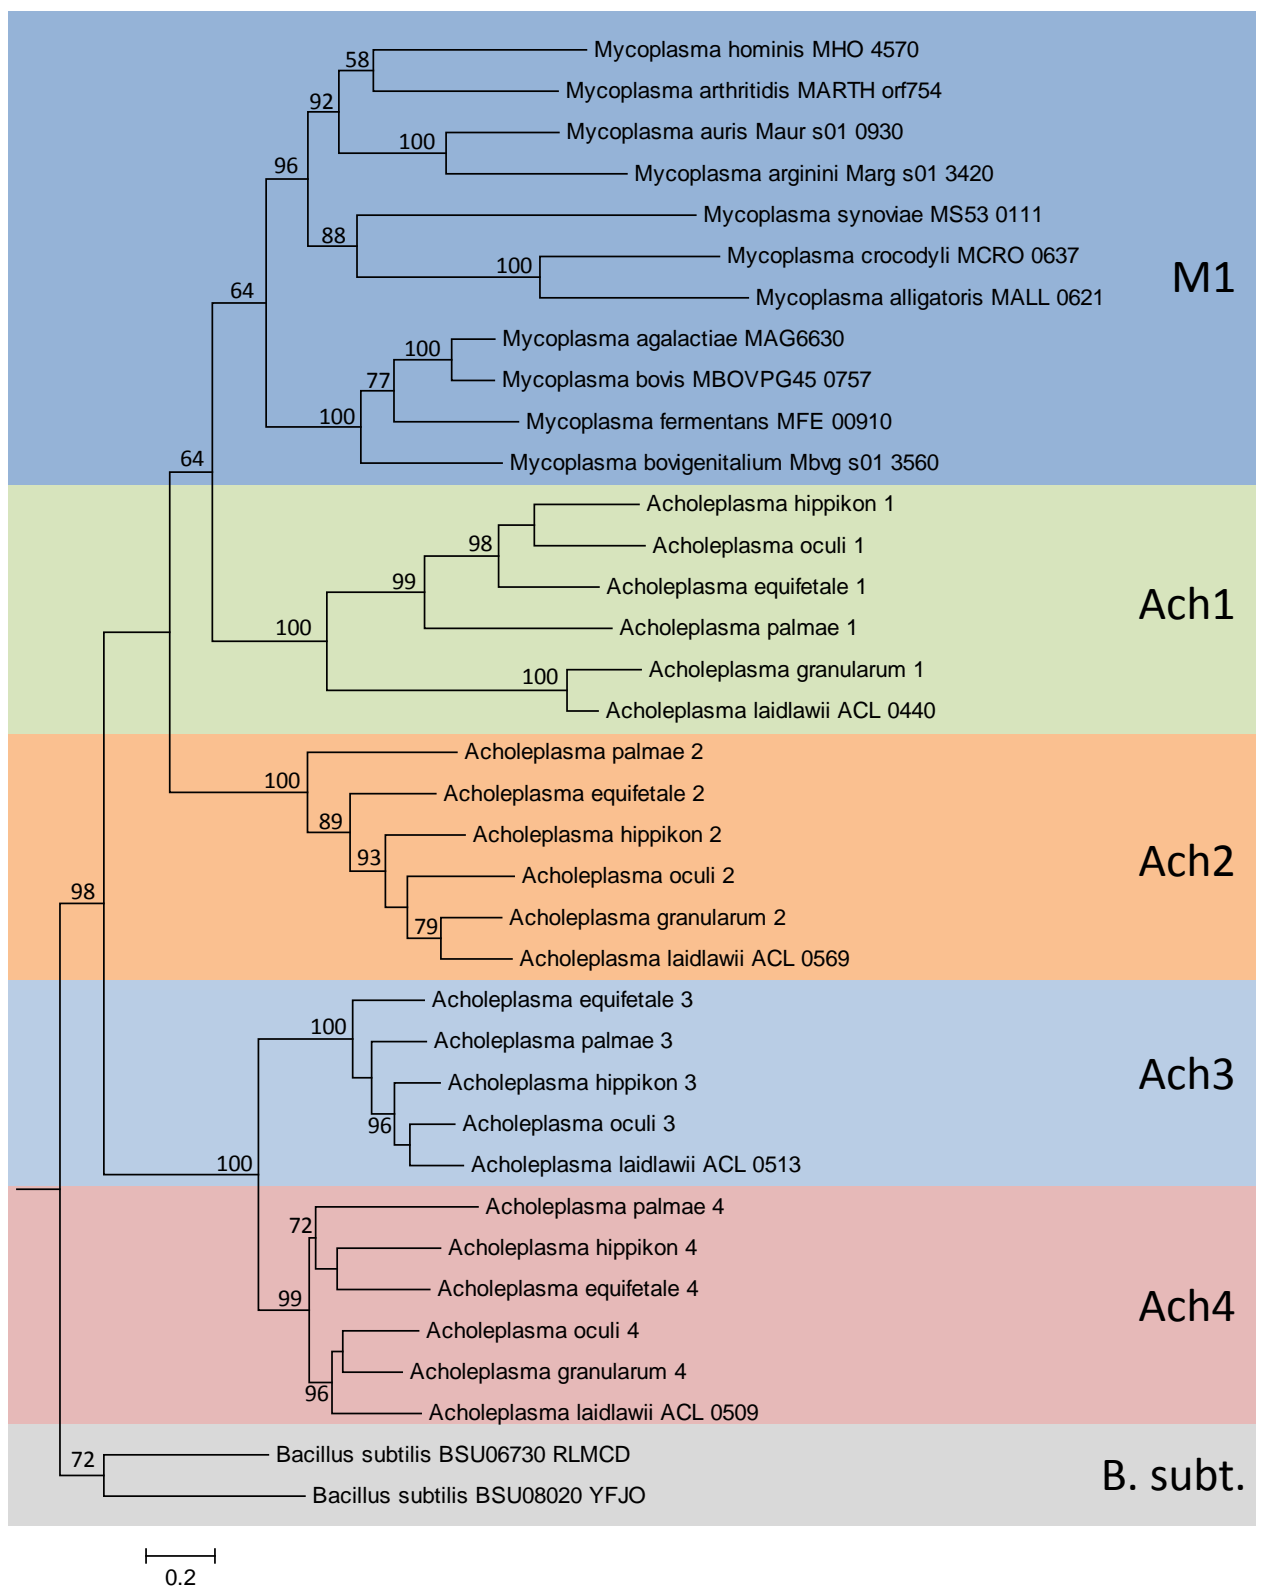

**Figure S7.** Phylogenetic analysis of RlmD/RlmCD/YfjO- related CDS in mollicutes. Alignment was obtained with MUSCLE and phylogenetic tree was inferred using the maximum likelihood method using the PhyML programme implemented in phylogeny.fr. Statistical aLRT values >50% are indicated on nodes. Main groups of homologs identified are indicated.
