# Supplementary material for: Reductive Evolution and Diversification of C5-Uracil Methylation in the Nucleic Acids of Mollicutes
Source: MDPI journal article supplement (doi:10.3390/biom10040587), 2020-04-10
Supplement: s1 [file s1]

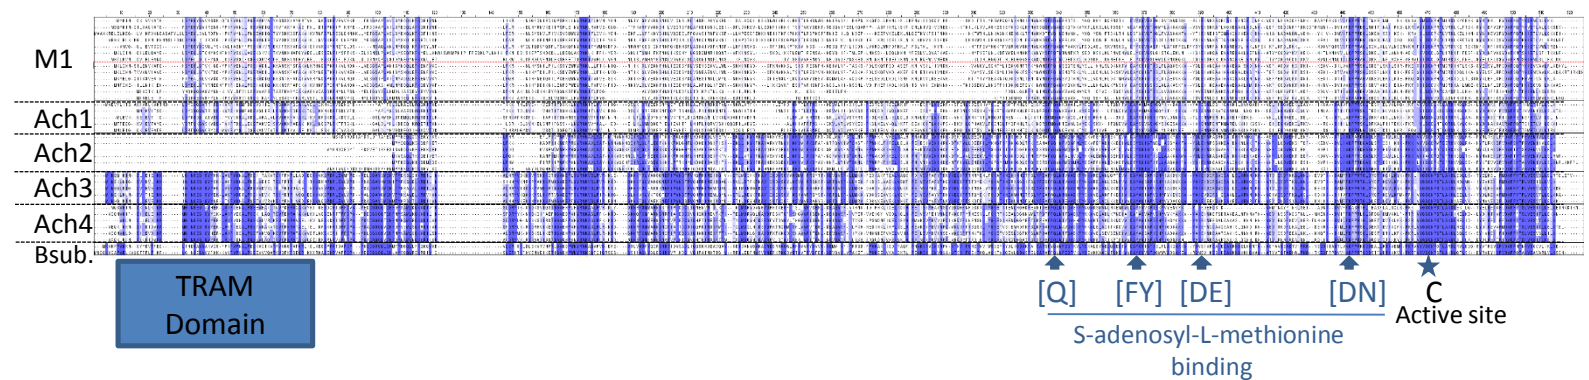

**Figure S10.** Conserved cysteines in RImD-related proteins. Multiple alignment used for the construction of the phylogenetic tree presented Figure 3 was implemented into Jalview to get an overview of the conserved positions. Amino-acids conserved at >50% are indicated in blue. Functionnal domain TRAM and important amino-acids are indicated underneath the alignment.
