# Supplementary figures and images for: Reductive Evolution and Diversification of C5-Uracil Methylation in the Nucleic Acids of Mollicutes
Source: MDPI journal article supplement (doi:10.3390/biom10040587), 2020-04-10

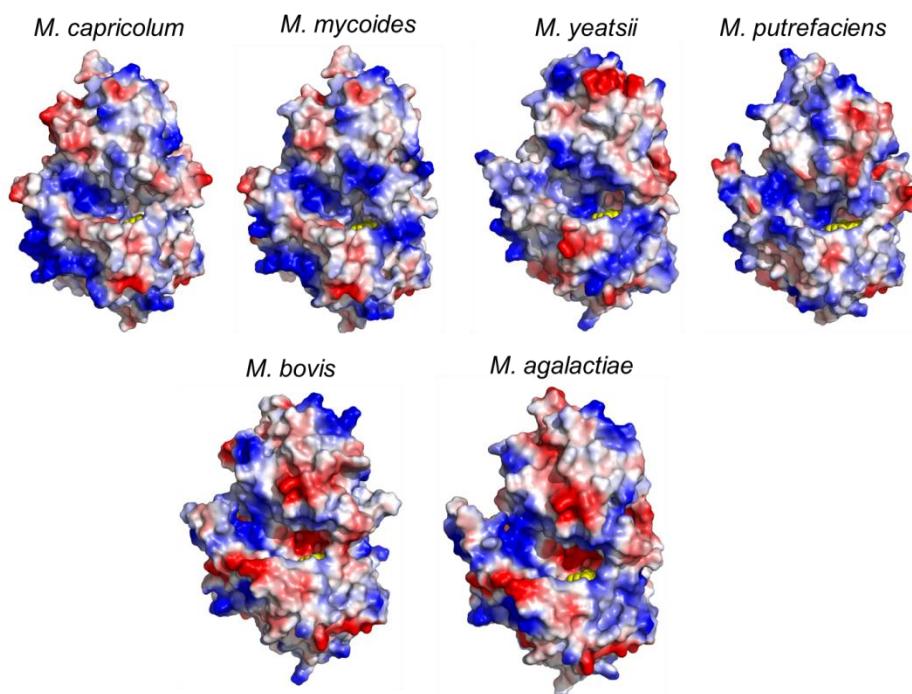

**Figure S9.** Electrostatic surface of model of TrmFO-like proteins from different mycoplasma.

Supplement: s1 [file s1]
